# Supplementary material
Source: PubMed Central journal article supplement (PMC6327951)

## Supporting Information

### *Streptococcus pneumoniae* Sialidase SpNanB-Catalyzed One-Pot Multienzyme (OPME) Synthesis of 2,7-Anhydro-Sialic acids as Selective Sialidase Inhibitors

An Xiao,<sup>1</sup> Teri J. Slack,<sup>1</sup> Yanhong Li,<sup>1</sup> Dashuang Shi,<sup>2</sup> Hai Yu,<sup>1</sup> Wanqing Li,<sup>1</sup> Yang Liu,<sup>2,†</sup> and Xi Chen<sup>1,\*</sup>

<sup>1</sup> Department of Chemistry, University of California, One Shields Avenue, Davis, California 95616, United States.

<sup>2</sup> Children's National Medical Center, 111 Michigan Ave, NW, Washington DC 20012, United States.

† Present Address: Division of Immunotherapy, Institute of Human Virology, University of Maryland, Baltimore, MD 21201, United States

\*Corresponding author: xiichen@ucdavis.edu

### Table of Contents

|                                                                                                                                               |    |
|-----------------------------------------------------------------------------------------------------------------------------------------------|----|
| <b>Table S1.</b> Substrate specificity of SpNanB.....                                                                                         | S2 |
| <b>Figure S1.</b> Substrate specificity study of SpNanB.....                                                                                  | S3 |
| <b>Figure S2.</b> Mass spectrometry result of the reaction mixture of Neu5Ac7N <sub>3</sub> α2–3Galβ <sub>p</sub> NP treated with SpNanB..... | S3 |
| <b>Table S2.</b> Percentage inhibition (%) of 2,7-anhydro-sialic acids ( <b>1–4</b> ) against bacterial and human sialidases.....             | S4 |
| <sup>1</sup> H and <sup>13</sup> C NMR spectra of 2,7-anhydro-Neu5Ac ( <b>1</b> ).....                                                        | S5 |
| <sup>1</sup> H and <sup>13</sup> C NMR spectra of 2,7-anhydro-Neu5TFA ( <b>2</b> ).....                                                       | S6 |
| <sup>1</sup> H and <sup>13</sup> C NMR spectra of 2,7-anhydro-Neu ( <b>3</b> ).....                                                           | S7 |
| <sup>1</sup> H and <sup>13</sup> C NMR spectra of 2,7-anhydro-Neu5Cyclohexyl ( <b>4</b> ).....                                                | S8 |

**Table S1.** Substrate specificity of SpNanB. Acceptable substrate is shown with “+” and nonacceptable substrate is shown with “-”.

| Substrate                | Sia $\alpha$ 2-3Gal $\beta$ pNP | Sia $\alpha$ 2-6Gal $\beta$ pNP |
|--------------------------|---------------------------------|---------------------------------|
| Neu5Ac-R                 | +                               | -                               |
| Neu5AcF-R                | +                               | -                               |
| Neu5AcOMe-R              | +                               | -                               |
| Neu5AcN <sub>3</sub> -R  | +                               | -                               |
| Neu5Ac9F-R               | +                               | -                               |
| Neu5Ac9OMe-R             | +                               | -                               |
| Neu5Ac9deoxy-R           | +                               | -                               |
| Neu5Ac9N <sub>3</sub> -R | +                               | -                               |
| Neu5Ac9NAc-R             | +                               | -                               |
| Neu5Ac7F-R               | +                               | -                               |
| Neu5Ac7OMe-R             | +                               | -                               |
| Neu5Ac7deoxy-R           | +                               | -                               |
| Neu5Ac7N <sub>3</sub> -R | +                               | -                               |
| Neu5Gc-R                 | +                               | -                               |
| Neu5Gc9F-R               | +                               | -                               |
| Neu5Gc9OMe-R             | +                               | -                               |
| Neu5Gc9deoxy-R           | +                               | -                               |
| Neu5Gc9N <sub>3</sub> -R | +                               | -                               |
| Kdn-R                    | -                               | -                               |
| Kdn5F-R                  | -                               | -                               |
| Kdn5N <sub>3</sub> -R    | -                               | -                               |
| Kdn5deoxy-R              | -                               | -                               |
| Kdn5OMe-R                | -                               | -                               |
| Kdn9F-R                  | -                               | -                               |
| Kdn9OMe-R                | -                               | -                               |
| Kdn9deoxy-R              | -                               | -                               |
| Kdn9N <sub>3</sub> -R    | -                               | -                               |
| Kdn7F-R                  | -                               | -                               |
| Kdn7OMe-R                | -                               | -                               |
| Kdn7deoxy-R              | -                               | -                               |
| Kdn7N <sub>3</sub> -R    | -                               | -                               |

**Figure S1.** Substrate specificity study of SpNanB using Sia $\alpha$ 2–3Gal $\beta$ pNP (white columns) or Sia $\alpha$ 2–6Gal $\beta$ pNP (black columns) as substrates.

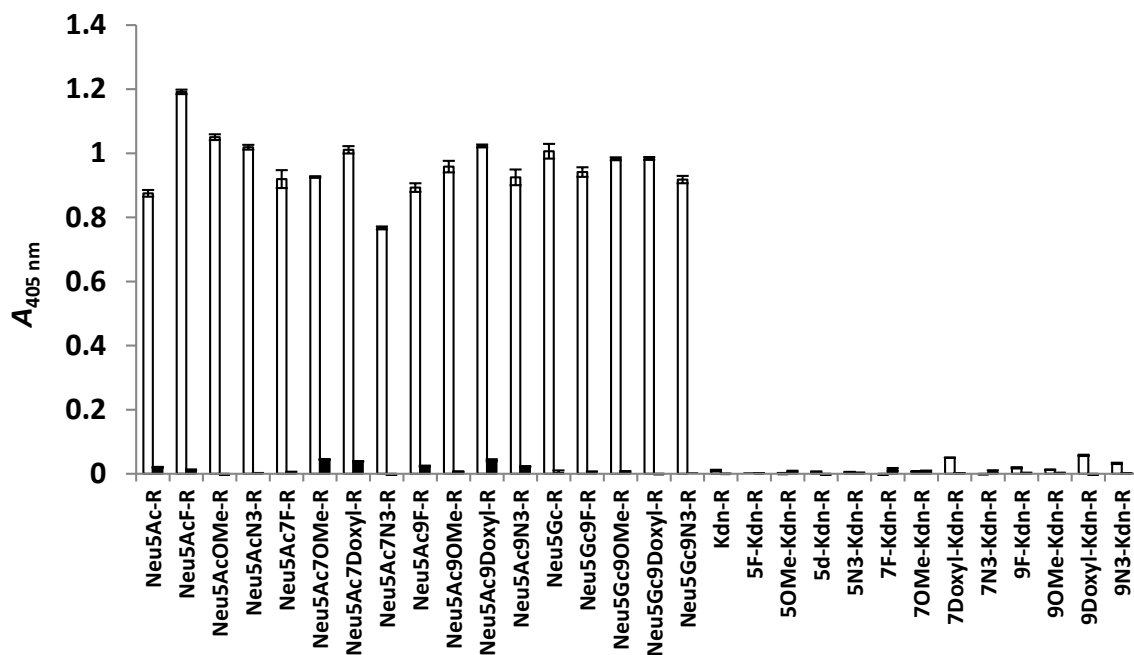

**Figure S2.** Mass spectrometry result of the reaction mixture of Neu5Ac7N $\alpha$ 2–3Gal $\beta$ pNP treated with SpNanB.

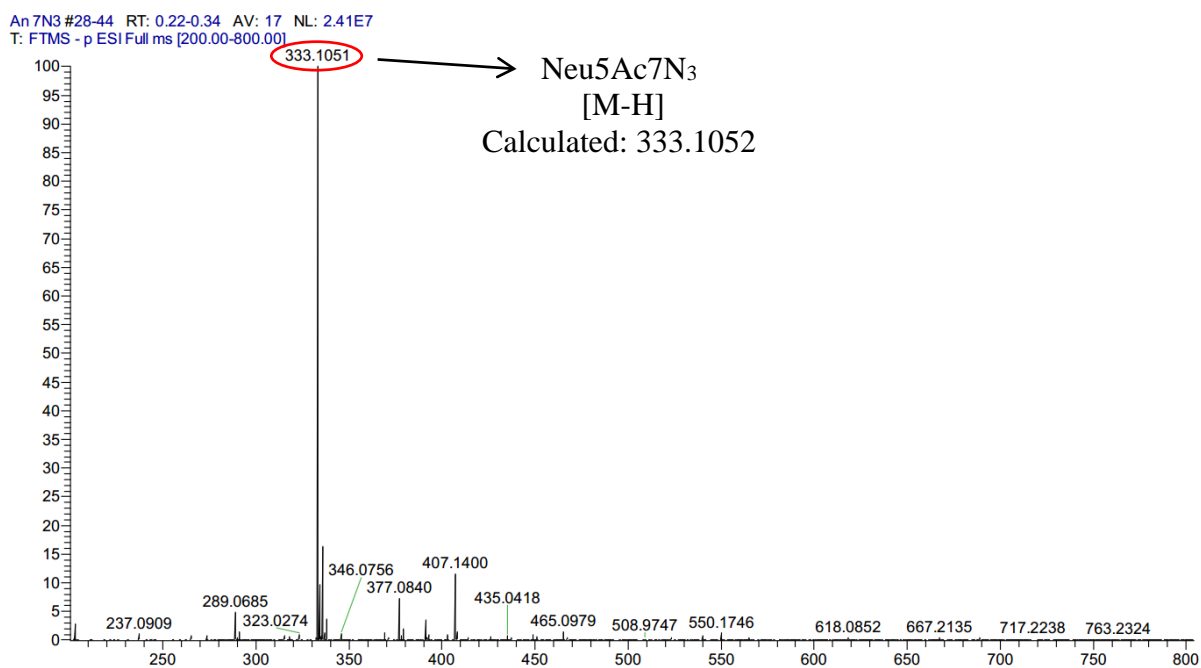

**Table S2.** Percentage inhibition (%) of 2,7-anhydro-sialic acids (**1–4**) (1 mM of each inhibitor was used) against bacterial and human sialidases. Neu5Ac2en was used as a control. Those with more than 50% inhibition are highlighted in bold.

| Sialidases  | Inhibitors        |            |                   |            |                   |
|-------------|-------------------|------------|-------------------|------------|-------------------|
|             | Neu5Ac2en         | (1)        | (2)               | (3)        | (4)               |
| SpNanA      | <b>98.9</b> ± 1.8 | 36.4 ± 0.1 | <b>83.8</b> ± 0.3 | 19.3 ± 4.2 | <b>61.2</b> ± 0.6 |
| SpNanB      | 26.1 ± 1.0        | 30.0 ± 1.7 | <b>68.2</b> ± 2.6 | 11.7 ± 2.6 | <b>86.6</b> ± 0.3 |
| SpNanC      | 9.0 ± 3.5         | 3.0 ± 1.9  | 4.4 ± 2.0         | 14.9 ± 3.0 | <b>94.2</b> ± 0.1 |
| AuSialidase | <b>99.6</b> ± 0.6 | 49.4 ± 1.3 | <b>85.1</b> ± 0.3 | 1.3 ± 2.2  | 16.8 ± 2.4        |
| CpNanI      | <b>93.3</b> ± 3.8 | 26.7 ± 3.7 | 44.1 ± 1.0        | 10.1 ± 5.7 | 13.6 ± 0.1        |
| VcSialidase | <b>98.8</b> ± 0.1 | 22.7 ± 1.2 | <b>62.1</b> ± 0.6 | 1.3 ± 2.0  | 1.2 ± 0.7         |
| PmST1       | 15.8 ± 0.1        | 10.2 ± 2.8 | 11.0 ± 2.7        | 13.8 ± 3.3 | 12.3 ± 1.9        |
| BiNanH2     | <b>95.3</b> ± 0.2 | 6.6 ± 1.8  | 3.8 ± 2.6         | 3.2 ± 3.2  | 1.2 ± 0.9         |
| hNEU2       | <b>99.8</b> ± 0.2 | 4.6 ± 1.1  | 2.5 ± 2.1         | 1.4 ± 2.4  | 3.6 ± 0.1         |

$^1\text{H}$  and  $^{13}\text{C}$  NMR spectra of 2,7-anhydro-Neu5Ac (**1**)

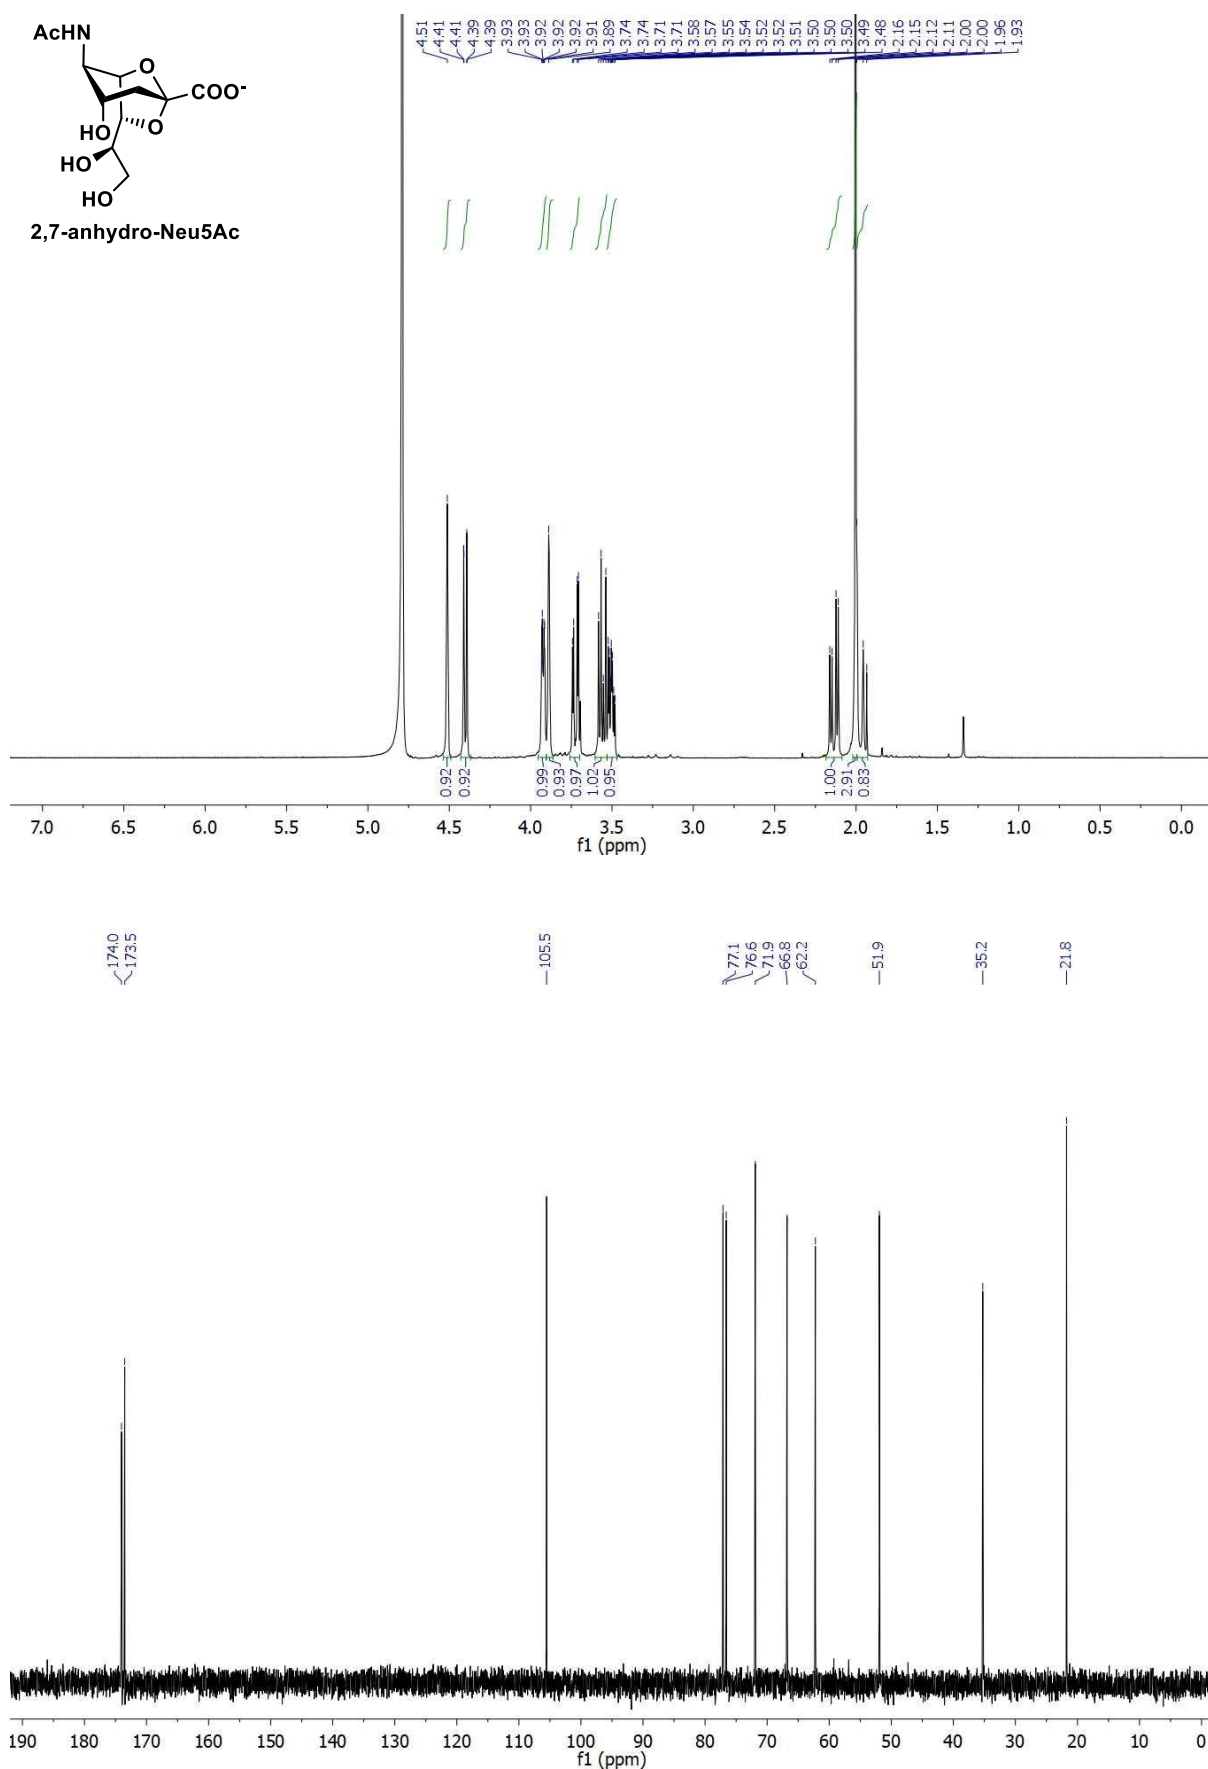

$^1\text{H}$  and  $^{13}\text{C}$  NMR spectra of 2,7-anhydro-Neu5TFA (2)

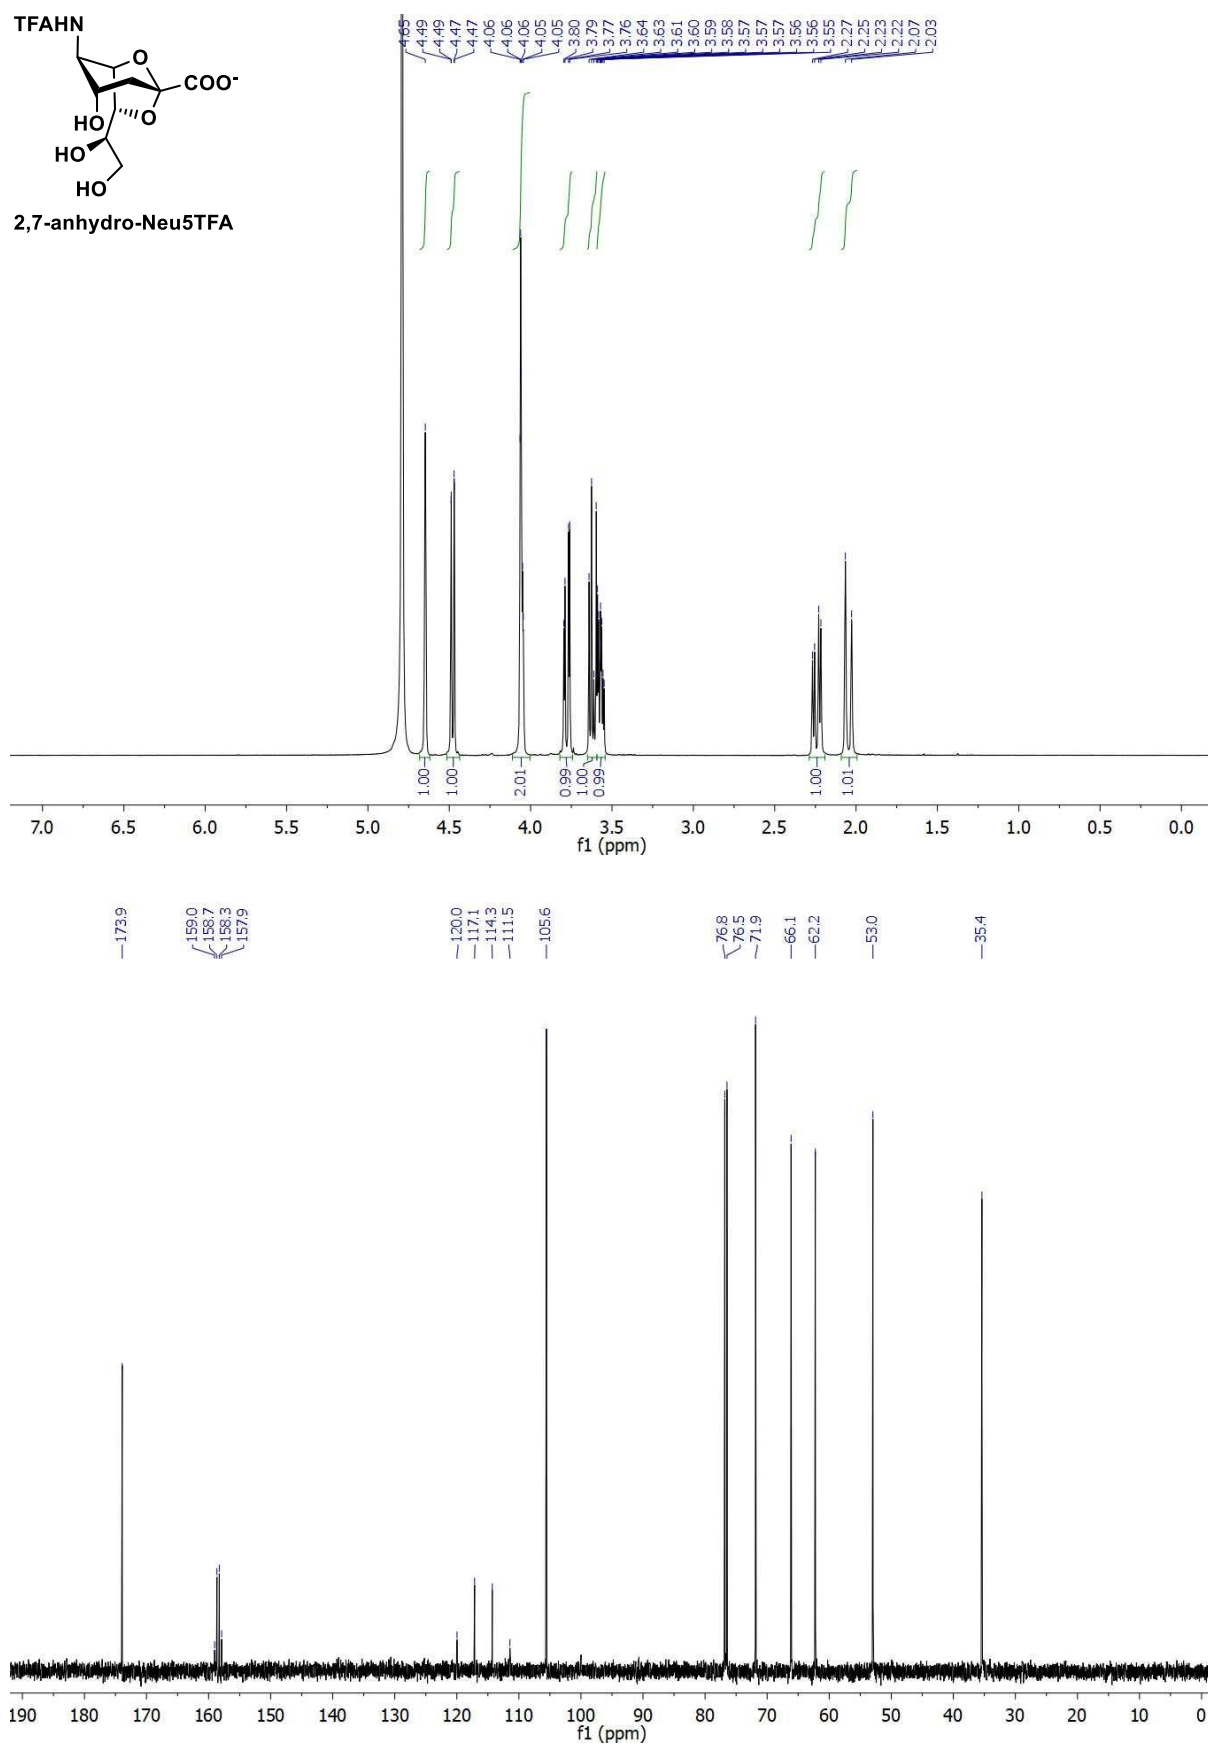

$^1\text{H}$  and  $^{13}\text{C}$  NMR spectra of 2,7-anhydro-Neu (**3**)

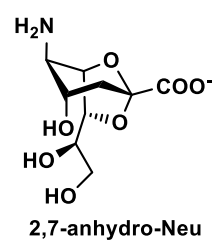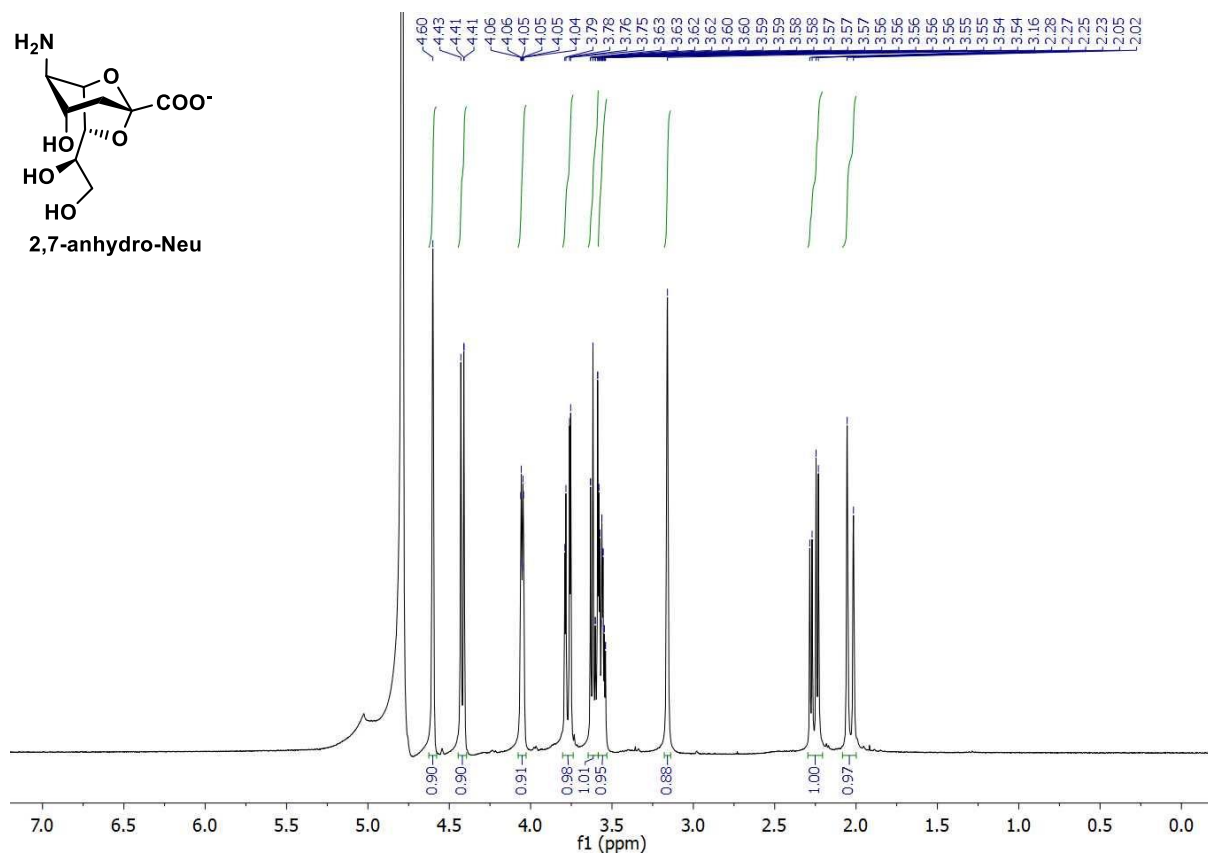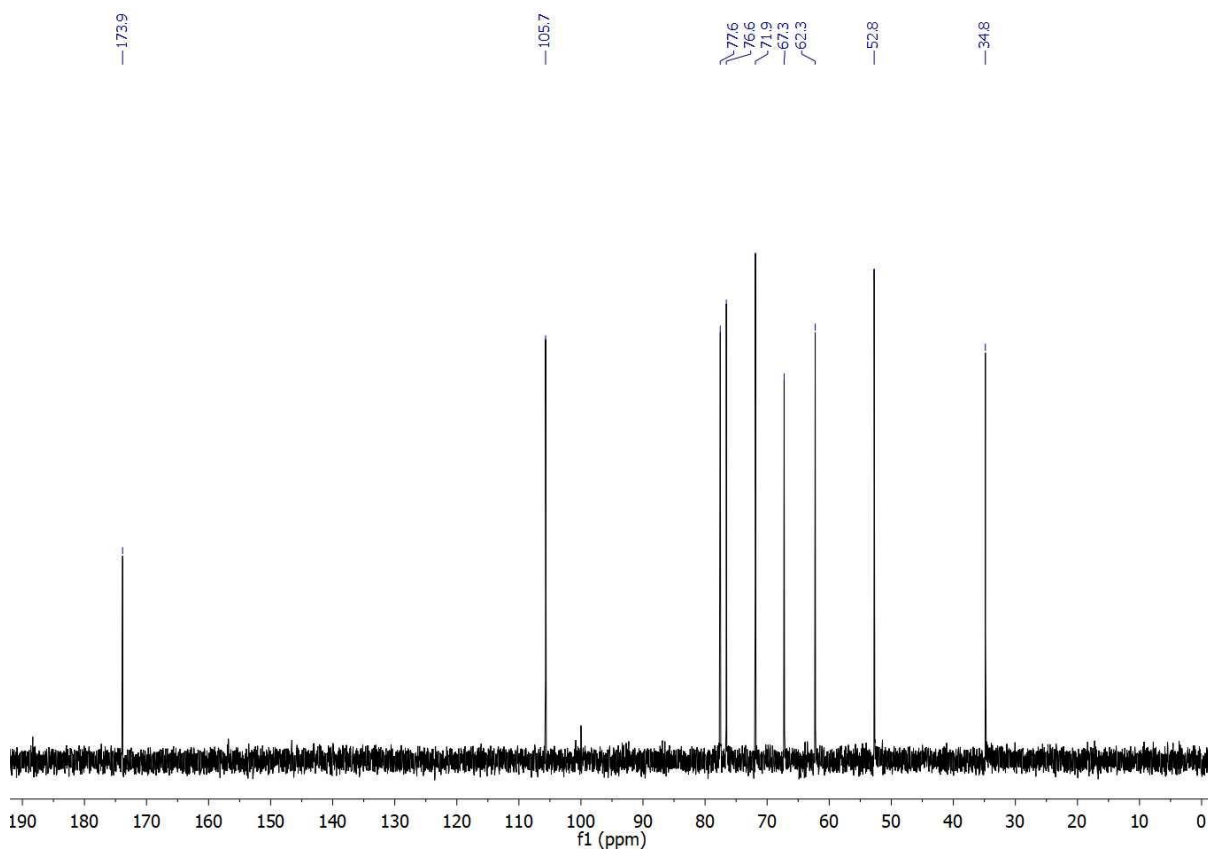

$^1\text{H}$  and  $^{13}\text{C}$  NMR spectra of 2,7-anhydro-Neu5Cyclohexyl (**4**)

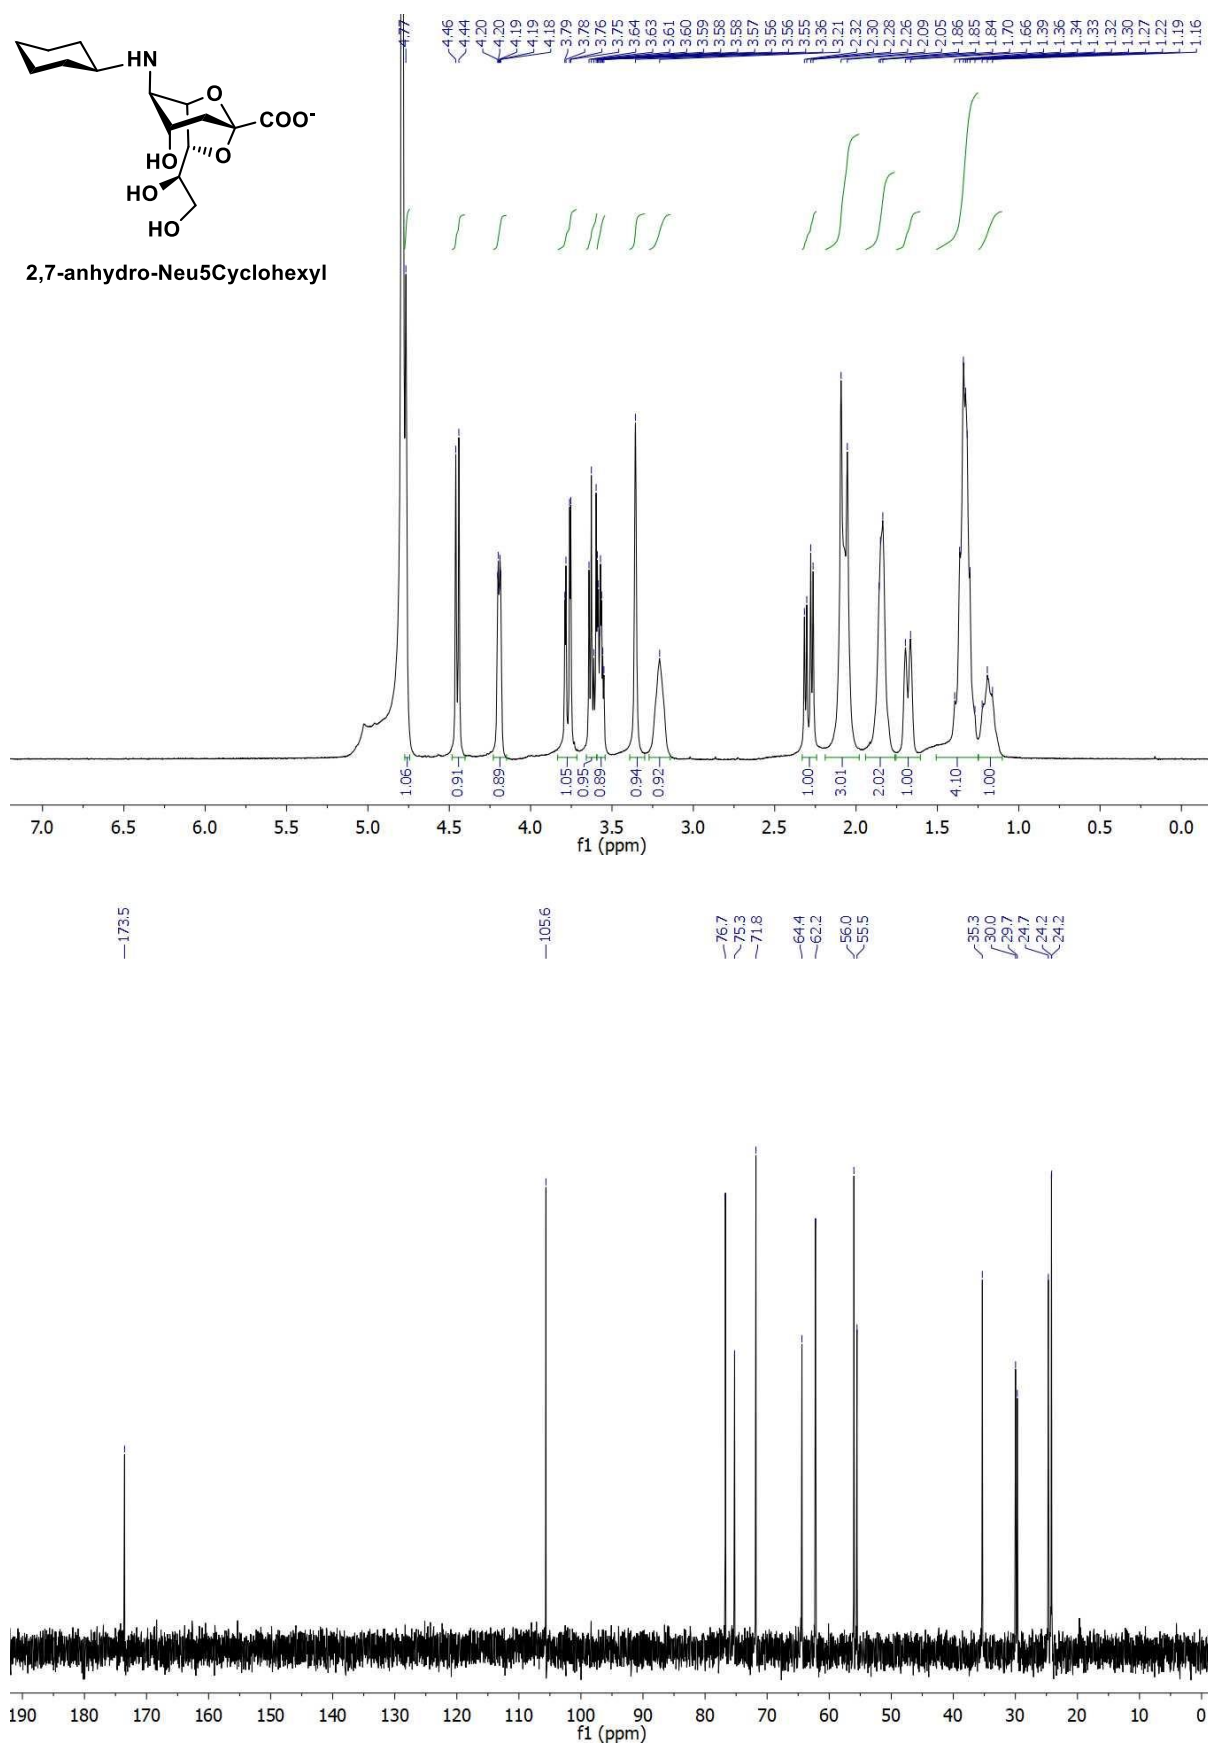

Supplement: NIHMS1004450-supplement-SI.pdf [file NIHMS1004450-supplement-SI.pdf]
